# Supplementary material for: Association between Periodontitis and HbA1c Levels in Non-Diabetic Patients: A Systematic Review and Meta-Analysis
Source: MDPI journal article supplement (doi:10.3390/healthcare11192649), 2023-09-28
Supplement: s1 [file s1]

**Table S2.** Data collection of details about periodontal examinations, covariates, clinical assessment methods, and normality test.

| First author<br>(publication<br>year) | Origin of subjects                                                                                                                                                                                                     | Country (city)           | Other information of periodontitis<br>(examination, teeth number,<br>previous periodontal treatment) | Covariates (e.g.,age, gender,<br>BMI, smoking habits)                                                                                                                              | Clinical assessment<br>methods (blinding;<br>training and<br>calibration) | Normality<br>test | Title                                                                                                                                                                                     |
|---------------------------------------|------------------------------------------------------------------------------------------------------------------------------------------------------------------------------------------------------------------------|--------------------------|------------------------------------------------------------------------------------------------------|------------------------------------------------------------------------------------------------------------------------------------------------------------------------------------|---------------------------------------------------------------------------|-------------------|-------------------------------------------------------------------------------------------------------------------------------------------------------------------------------------------|
| Gomathi GD<br>(2023)                  | Outpatient clinic of<br>the department of<br>periodontics and<br>implantology, Thai<br>Moogambigai Dental<br>College and Hospital,<br>D. MGR Educational<br>and Research<br>Institute, Chennai.                        | India (Chennai)          | Without any therapy in the past<br>six months                                                        | Not mention                                                                                                                                                                        | Not mention                                                               | No                | Effects of Non-surgical Periodontal<br>Therapy on Saliva and Gingival<br>Crevicular Fluid Levels of<br>Chemerin in Periodontitis Subjects<br>With and Without Type 2 Diabetes<br>Mellitus |
| Mahendra J<br>(2022)                  | Controls from a<br>general hospital of<br>PSM College of<br>Dental Science and<br>Research, Thrissur;<br>cases from PSM<br>Dental College of<br>Science, Kerala,<br>between January<br>2019 and February<br>2020.      | India (Thrissur)         | At least 12 natural teeth; without<br>periodontal treatment in the past 6<br>months                  | Gender, age, body mass index<br>and socioeconomic status in<br>periodontitis group and<br>control group were present<br>but no statistical comparison.                             | Blinded; one trained<br>investigator                                      | Yes               | Impact of Red Complex Bacteria<br>and TNF- $\alpha$ Levels on the Diabetic<br>and Renal Status of Chronic<br>Kidney Disease Patients in the<br>Presence and Absence of<br>Periodontitis   |
| George AK<br>(2021)                   | Department of<br>Periodontics,<br>Pushpagiri College of<br>Dental Sciences,<br>Pushpagiri Institute of<br>Medical Sciences and<br>Research Centre,<br>Thiruvalla, Kerala,<br>India, between June<br>2018 to June 2019. | India (Kerala)           | Six sites per-tooth; full mouth; at<br>least 20 natural teeth                                        | Age, gender and body mass<br>index in Periodontitis group<br>and periodontal health group<br>$p>0.05$ .                                                                            | A single trained<br>periodontist                                          | No                | A pilot study on glycemia and<br>insulin resistance in patients with<br>severe<br>periodontitis                                                                                           |
| Akram Z (2020)                        | Not reported                                                                                                                                                                                                           | Saudi Arabia<br>(Riyadh) | Six sites per-tooth; full mouth,<br>dentate                                                          | The body mass index in<br>periodontitis group and<br>periodontal health group<br>$p<0.05$ ; gender and age in<br>periodontitis group and<br>periodontal health group<br>$p>0.05$ . | Blinded; a trained and<br>calibrated examiner<br>(kappa value 0.92)       | Yes               | Levels of advanced glycation end<br>products in gingival crevicular fluid<br>of chronic periodontitis patients<br>with and without type-2 diabetes<br>mellitus                            |

|                         |                                                                                                                                                                                            |                   |                                                                                                                                                                                                                         |                                                                                                                                                                  |                                                                  |     |                                                                                                                                                                                                                 |
|-------------------------|--------------------------------------------------------------------------------------------------------------------------------------------------------------------------------------------|-------------------|-------------------------------------------------------------------------------------------------------------------------------------------------------------------------------------------------------------------------|------------------------------------------------------------------------------------------------------------------------------------------------------------------|------------------------------------------------------------------|-----|-----------------------------------------------------------------------------------------------------------------------------------------------------------------------------------------------------------------|
| Altingoz SM (2020)      | The Department of Periodontology, School of Dentistry, and the Department of Endocrinology, School of Medicine, at Ankara University between 03/2011 and 03/2013.                          | Turkey (Ankara)   | Six sites per-tooth at all teeth present, except third molars; at least 16 teeth remained; without non-surgical periodontal therapy in the previous 6 months and surgical periodontal therapy in the previous 12 months | Gender, age, smoking and body mass index in periodontitis group and periodontal health group $p>0.05$ .                                                          | One trained and calibrated examiner                              | Yes | Salivary and serum oxidative stress biomarkers and advanced glycation end products in periodontitis patients with or without diabetes: A cross-sectional study                                                  |
| Yilmaz D (2020)         | The Periodontology Department of Faculty of Dentistry, Sakarya University and Internal Medicine Department of Faculty of Medicine, Sakarya University between March 2018 and January 2019. | Turkey (Sakarya)  | Six sites per-tooth; full mouth excluded third molar; without periodontal treatment in the past 6 months                                                                                                                | Gender and smoking in Periodontitis group and periodontal health group $p>0.05$ .                                                                                | One calibrated specialist (Kappa value 0.91)                     | Yes | Salivary human beta-defensins and cathelicidin levels in relation to periodontitis and type 2 diabetes mellitus                                                                                                 |
| Agrawal AA (2019)       | The out-patient department, Department of Periodontics and Implantology, VSPM Dental College and Research Centre, Nagpur, India.                                                           | India (Nagpur)    | Six sites per tooth in all present teeth excluding third molars; without periodontal treatment in the past 6 months                                                                                                     | Age in periodontitis group and periodontal health group were shown but no statistical comparison.                                                                | A single examiner (ICC were between 0.92 and 0.99 in the groups) | No  | Evaluation and comparison of serum vitamin D and calcium levels in periodontally healthy, chronic gingivitis and chronic periodontitis in patients with and without diabetes mellitus - a cross-sectional study |
| Matic Petrovic S (2019) | The Department of Periodontology and Oral Medicine, School of Dental Medicine, University of Belgrade from February 2015 to April 2017                                                     | Serbia (Belgrade) | Six sites per-tooth; full mouth except third molars; more than 14 teeth remained; without periodontal treatment in the past 1.5 years                                                                                   | Gender, age and smoking in periodontitis group and periodontal health group $p>0.05$ .                                                                           | Two experienced and calibrated doctors (Kappa value 0.5-0.6)     | No  | Subgingival areas as potential reservoirs of different Candida spp in type 2 diabetes patients and healthy subjects                                                                                             |
| Suresh R (2019)         | Department of Periodontics, Amrita School of Dentistry, Amrita vishwa vidhyapeetham, Ponckara, Edapally, Cochin, India.                                                                    | India (Cochin)    | Six sites per tooth in all teeth, excluding third molars; at least 20 natural teeth; without periodontal treatment in the past 6 months                                                                                 | The body mass index in periodontitis group and periodontal health group $p<0.05$ ; gender and age in periodontitis group and periodontal health group $p>0.05$ . | A single examiner                                                | No  | Effect of Non-Surgical Periodontal Therapy on the Serum Sialic Acid Levels in Diabetic Patients with Periodontitis                                                                                              |

|                    |                                                                                                                                                   |                    |                                                                                                                                                                                                                                      |                                                                                                                                                      |                                                                                       |     |                                                                                                                                                                                                   |
|--------------------|---------------------------------------------------------------------------------------------------------------------------------------------------|--------------------|--------------------------------------------------------------------------------------------------------------------------------------------------------------------------------------------------------------------------------------|------------------------------------------------------------------------------------------------------------------------------------------------------|---------------------------------------------------------------------------------------|-----|---------------------------------------------------------------------------------------------------------------------------------------------------------------------------------------------------|
| Zainab AJAA (2019) | India                                                                                                                                             | India (Karnataka)  | Full mouth excluding third molars; at least 20 functional teeth; without professional periodontal treatment in the past 6 months                                                                                                     | Gender matched in periodontitis group and periodontal health group ; age in periodontitis group and periodontal health group $p<0.05$ .              | A single, calibrated examiner ( $\kappa$ -light test, agreement $>0.85$ )             | No  | Salivary Levels of Antimicrobial Peptides in Chronic Periodontitis Patients with Type 2 Diabetes                                                                                                  |
| Acharya AB (2018)  | Volunteers (Professionals, administrative staff, health care workers), and patients visited outpatient departments of their associated hospitals. | India (Karnataka)  | Dentate; without periodontal treatment in the past 90 days                                                                                                                                                                           | Age in periodontitis group and periodontal health group $p>0.05$ .                                                                                   | Not mention                                                                           | No  | Systemic Cytokines in Type 2 Diabetes Mellitus and Chronic Periodontitis                                                                                                                          |
| Han K (2018)       | The KNHANES from 2013 to 2015.                                                                                                                    | Korea              | Six sites per-tooth; at least 2 teeth remained                                                                                                                                                                                       | Gender, age, smoking and body mass index in periodontitis group and periodontal health group $p<0.05$ .                                              | Trained dental practitioners                                                          | No  | Clinical implication of fasting glucose and systolic/diastolic blood pressure on the prevalence of periodontitis in non-diabetic and non-hypertensive adults using nationally representative data |
| Dogan SB (2016a)   | The Department of Periodontology, Faculty of Dentistry, Bülent Ecevit University, Zonguldak, Turkey, between July 2014 and May 2015.              | Turkey (Ankara)    | Six sites per-tooth; full mouth excluding third molars; at least 20 teeth; without non-surgical periodontal therapy in the previous 6 months and surgical periodontal therapy in the previous year                                   | Gender, age and body mass index in periodontitis group and periodontal health group $p>0.05$ .                                                       | A single calibrated examiner (similarity $>90\%$ at the millimeter level)             | Yes | Levels of vaspin and omentin-1 in gingival crevicular fluid as potential markers of inflammation in patients with chronic periodontitis and type 2 diabetes mellitus                              |
| Dogan SB (2016b)   | The Department of Peridontology, Faculty of Dentistry, Bülent Ecevit University between the dates of July 2014 and May 2015.                      | Turkey (Zonguldak) | Six sites per-tooth; full mouth excluding third molars; at least 20 teeth (not including third molars); without non-surgical periodontal therapy in the previous 6 months and surgical periodontal therapy in the previous 12 months | Gender, age and body mass index in periodontitis group and periodontal health group $p>0.05$ .                                                       | Blinded; a single calibrated examiner (similarity $>90\%$ at the millimeter level)    | Yes | Chemerin as a Novel Crevicular Fluid Marker of Patients With Periodontitis and Type 2 Diabetes Mellitus                                                                                           |
| Grdovic N (2016)   | Caucasian subjects of Serbian nationality between March 2013 and January 2015                                                                     | Serbia (Belgrade)  | Six sites per-tooth; full mouth; more than 14 teeth remained; without periodontal treatment in the past 1.5 years                                                                                                                    | Gender and smoking in periodontitis group and periodontal health group $p>0.05$ ; age in periodontitis group and periodontal health group $p<0.05$ . | Two experienced and calibrated doctors (with a degree of agreement within 1mm in 95%) | Yes | Association of CXCL12 gene promoter methylation with periodontitis in patients with diabetes mellitus type 2                                                                                      |

|                         |                                                                                                                                                             |                   |                                                                                                     |                                                                                                                |                         |     |                                                                                                                                                                           |
|-------------------------|-------------------------------------------------------------------------------------------------------------------------------------------------------------|-------------------|-----------------------------------------------------------------------------------------------------|----------------------------------------------------------------------------------------------------------------|-------------------------|-----|---------------------------------------------------------------------------------------------------------------------------------------------------------------------------|
| Hong M (2016)           | Data derived from the fifth KNHANES, conducted in 2012 by the Korea CDC.                                                                                    | Korea             | The eight molars and the upper right and lower left central incisors were examined for each sextant | Gender, age, smoking and body mass index in Periodontitis group and periodontal health group $p<0.05$ .        | Not mention             | No  | Prevalence and risk factors of periodontitis among adults with or without diabetes mellitus                                                                               |
| Mishra V (2016)         | The Department of Periodontics and Oral Implantology, SDM College of Dental Sciences and Hospital, Dharwad, Karnataka, India.                               | India (Telangana) | At least 20 natural teeth; without periodontal treatment in the past 6 months                       | Body mass index in periodontitis group and periodontal health group $p>0.05$ .                                 | Not mention             | No  | Interlinking periodontitis and type 2 diabetes mellitus by assessment of crevicular visfatin levels in health and in disease before and after initial periodontal therapy |
| Vaghani H (2016)        | The Department of Periodontics, Karnavati School of Dentistry, Gujarat, India                                                                               | India (Gujarat)   | At least 20 teeth; without periodontal treatment in the past 6 months                               | Body mass index in periodontitis group and periodontal health group was present but no statistical comparison. | Not mention             | No  | Effect of Non-surgical Periodontal Therapy on Glycosylated Haemoglobin Levels in Diabetics and Non-diabetic Healthy Controls with Periodontitis                           |
| Acharya AB (2015)       | The Department of Periodontics and the Department of General Medicine of the associated hospital                                                            | India (Karnataka) | At least 20 natural teeth; without nonsurgical therapy for CPD in the past 3 months                 | Not mention                                                                                                    | Not mention             | Yes | Effect of scaling and root planing on serum interleukin-10 levels and glycemic control in chronic periodontitis and type 2 diabetes mellitus                              |
| Lappin DF (2015)        | Diabetic out-patient clinics at Glasgow Royal Infirmary, Stobhill Hospital, and Glasgow Dental Hospital and School (all Glasgow, UK) between 2007 and 2010. | UK (Glasgow)      | Six sites per-tooth; full mouth; at least 20 teeth remained                                         | Age in periodontitis group and periodontal health group $p>0.05$ .                                             | Not mention             | No  | The Influence of Glycated Hemoglobin on the Cross Susceptibility Between Type 1 Diabetes Mellitus and Periodontal Disease                                                 |
| Matic Petrovic S (2015) | Not reported                                                                                                                                                | Serbia (Belgrade) | Six sites per-tooth; full mouth; without periodontal treatment in the past 1.5 years                | Gender, age and smoking in periodontitis group and periodontal health group $p>0.05$ .                         | Two calibrated doctors  | No  | Detection and sampling methods for isolation of Candida spp. from oral cavities in diabetics and non-diabetics                                                            |
| Muthu J (2015)          | The patient pool of the Department of Periodontology, Meenakshi Ammal Dental College and Hospital, Chennai, India.                                          | India (Chennai)   | At least 10 teeth; without periodontal treatment in the past 6 months                               | Body mass index in periodontitis group and periodontal health group $p>0.05$ .                                 | One calibrated examiner | No  | Effect of Nonsurgical Periodontal Therapy on the Glycaemic Control of Nondiabetic Periodontitis Patients: A Clinical Biochemical Study                                    |

|                     |                                                                                                                                                                                                                                                         |                     |                                                                                                                   |                                                                                                                                                                         |                                                                 |     |                                                                                                                                                |
|---------------------|---------------------------------------------------------------------------------------------------------------------------------------------------------------------------------------------------------------------------------------------------------|---------------------|-------------------------------------------------------------------------------------------------------------------|-------------------------------------------------------------------------------------------------------------------------------------------------------------------------|-----------------------------------------------------------------|-----|------------------------------------------------------------------------------------------------------------------------------------------------|
| Srinivasa TS (2015) | The Out Patient Department of Periodontics, Rungta College of Dental Sciences and Research, Kohka-Kurud, Bhilai, Chhattisgarh.                                                                                                                          | India(Karnataka)    | Not mention                                                                                                       | Age in periodontitis group and control group $p=0.8$ ; gender in periodontitis group and control group $p=0.65$ .                                                       | Not mention                                                     | No  | Comparative clinical evaluation of glycosylated haemoglobin level in healthy and chronic periodontitis patients: A chairside diagnostic method |
| Corbi SCT (2014)    | The Araraquara School of Dentistry, Universidade Estadual Paulista, Brazil                                                                                                                                                                              | Brazil (Araraquara) | Six sites per-tooth; at least 15 teeth; without periodontal treatment or surgery in the past 6 months             | Gender and body mass index in Periodontitis group and periodontal health group $p>0.05$ ; age in Periodontitis group and periodontal health group $p<0.05$ .            | One single trained calibrated examiner (Kappa value 0.89)       | Yes | Elevated micronucleus frequency in patients with type 2 diabetes, dyslipidemia and periodontitis                                               |
| Gokhale NH (2014)   | The outpatient departments of the Department of Periodontics and Oral Implantology, and the Department of General Medicine, Shri Dharmasthala Manjunateshwara College of Dental Sciences and Hospital in Dharwad, India, between May 2012 and July 2012 | India (Karnataka)   | At least 20 teeth                                                                                                 | Body mass index in periodontitis group and health control group $p= 0.6867$ .                                                                                           | A single examiner                                               | Yes | Resistin levels in gingival crevicular fluid of patients with chronic periodontitis and type 2 diabetes mellitus                               |
| Javed F (2014)      | Periodontitis group: Males from the Department of Dentistry of Jinnah Postgraduate Medical Center, Karachi, Pakistan. Healthy individuals: Males from a residential area. Study conducted from February to June 2013.                                   | Pakistan (Karachi)  | Six sites per-tooth; full mouth excluded third molar; dentate; without periodontal treatment in the past 6 months | Gender and age in periodontitis group and periodontal health group $p>0.05$ , family history of diabetes in periodontitis group and periodontal health group $p<0.05$ . | Blind; a trained and calibrated investigator (Kappa value 0.78) | No  | Whole Salivary Interleukin-6 and Matrix Metalloproteinase-8 Levels in Patients With Chronic Periodontitis With and Without Prediabetes         |
| Perayil J (2014)    | The Outpatient Department of                                                                                                                                                                                                                            | India (Kochi)       | Six sites per-tooth; full mouth excluded third molar; more than 20 teeth remained; without                        | Gender and body mass index in periodontitis group and periodontal health group                                                                                          | One trained periodontist                                        | No  | Comparison of glycated hemoglobin levels in individuals without diabetes and with and                                                          |

|                       |                                                                                                                                                                                                 |                   |                                                                                                                                      |                                                                                                                                                   |                                     |     |                                                                                                                                 |
|-----------------------|-------------------------------------------------------------------------------------------------------------------------------------------------------------------------------------------------|-------------------|--------------------------------------------------------------------------------------------------------------------------------------|---------------------------------------------------------------------------------------------------------------------------------------------------|-------------------------------------|-----|---------------------------------------------------------------------------------------------------------------------------------|
|                       | Periodontics, Amrita School of Dentistry.                                                                                                                                                       |                   | periodontal treatment in the past 6 months                                                                                           | $p>0.05$ ; age in periodontitis group and periodontal health group $p<0.05$ .                                                                     |                                     |     | without periodontitis before and after non-surgical periodontal therapy                                                         |
| Rajan P (2013)        | The outpatient department of Periodontics, St. Joseph Dental College, Eluru, Andra Pradesh, India.                                                                                              | India (Eluru)     | More than 10 teeth; without periodontal treatment in the past 6 months                                                               | Age and gender in periodontitis group and control group $p>0.05$ ; body mass index in periodontitis group and control group $p<0.05$ .            | One examiner                        | No  | Comparison of glycosylated hemoglobin (HbA1C) levels in patients with chronic periodontitis and healthy controls                |
| Rao Deepika PC (2013) | The Department of Periodontology, JSS Dental College and Hospital over a period of 3 months.                                                                                                    | India (Karnataka) | Four sites per-tooth; more than 15 teeth; without periodontal treatment in the past 6 months                                         | Age and body mass index in periodontitis group and control group $p>0.05$ ; gender in periodontitis group and periodontal health group $p<0.05$ . | Two trained examiners (Kappa > 0.8) | No  | Comparison of HbA1c levels in severe periodontitis patients and healthy controls: A study in an Indian population               |
| Zizzi A (2013)        | The Division of Periodontology, Department of Odontostomatological and Specialized Clinical Sciences of the Polytechnic University of Marche, Ancona, Italy. Study conducted between 2005-2011. | Italy (Ancona)    | Six sites per tooth for the whole mouth excluding third molars; at least 20 teeth; without periodontal treatment in the past 2 years | Body mass index in periodontitis group and periodontal health group $p<0.05$ ; age in periodontitis group and health control group $p>0.05$ .     | A single examiner                   | Yes | Gingival advanced glycation end-products in diabetes mellitus-associated chronic periodontitis: an immunohistochemical study    |
| Saxena RM (2012)      | The Department of Periodontics, JSS Dental College and Hospital, a Constituent College of JSS University, Mysore, India, over a period of 2 months.                                             | India (Mysore)    | Four sites per-tooth; more than 10 natural teeth; no periodontal treatment undertaken within the previous 6 months                   | Body mass index in periodontitis group and health control group $p>0.05$ .                                                                        | Not mention                         | No  | Comparison of glycosylated hemoglobin levels in periodontitis patients and healthy controls: A pilot study in Indian population |
| Pan Z (2010)          | The Clinics, Adana Medical and Research Center, Baskent University, between September 2007 and August 2008.                                                                                     | Turkey (Ankara)   | Six sites per tooth; full mouth; more than 20 teeth; without periodontal treatment in the past 6 months                              | Not mention                                                                                                                                       | Not mention                         | Yes | Nitric Oxide Synthase in Gingival Tissues of Patients With Chronic Periodontitis and With and Without Diabetes                  |
| Wolff RE (2009)       | The University of Minnesota School of Dentistry clinics                                                                                                                                         | US (Minnesota)    | Six sites per-tooth; full mouth; At least 10 teeth remained; without periodontal treatment in the past 6 months                      | Age in periodontitis group and periodontal health group $p>0.05$ ; gender, smoking and body mass index, in                                        | One board-certified periodontist    | No  | A Pilot Study of Glycosylated Hemoglobin Levels in Periodontitis Cases and Healthy Controls                                     |

|                  |                               |                 |                                                      |                                                                |                   |     |                                                                                                          |
|------------------|-------------------------------|-----------------|------------------------------------------------------|----------------------------------------------------------------|-------------------|-----|----------------------------------------------------------------------------------------------------------|
|                  | between June and August 2008. |                 |                                                      | periodontitis group and periodontal health group<br>$p<0.05$ . |                   |     |                                                                                                          |
| Akalın FA (2008) | Not reported                  | Turkey (Ankara) | Full mouth periapical radiographs; at least 15 teeth | Not mention                                                    | A single examiner | Yes | Superoxide dismutase activity in gingiva in type-2 diabetes mellitus patients with chronic periodontitis |
