# Supplementary material for: Association between Periodontitis and HbA1c Levels in Non-Diabetic Patients: A Systematic Review and Meta-Analysis
Source: MDPI journal article supplement (doi:10.3390/healthcare11192649), 2023-09-28
Supplement: s1 [file s1]

**Table S4.** Quality assessment of included studies (n = 34)

| <b>Cross-sectional studies</b> | <b>Selection</b> | <b>Comparability</b> | <b>Outcome</b> | <b>Max 8 *</b> | <b>Max 100%</b> |
|--------------------------------|------------------|----------------------|----------------|----------------|-----------------|
| Yilmaz D (2020)                | *                | **                   | *              | 4/8            | 50.0%           |
| Matic Petrovic S (2019)        | *                | **                   | **             | 5/8            | 62.5%           |
| Han K (2018)                   | * **             | **                   | **             | 7/8            | 87.5%           |
| Hong M (2016)                  | * **             | **                   | **             | 7/8            | 87.5%           |
| Lappin DF (2015)               | *                | *                    | *              | 3/8            | 37.5%           |

  

| <b>Case-control studies</b> | <b>Selection</b> | <b>Comparability</b> | <b>Exposure</b> | <b>Max 9 *</b> | <b>Max 100%</b> |
|-----------------------------|------------------|----------------------|-----------------|----------------|-----------------|
| Gomathi GD (2023)           | **               |                      | **              | 4/9            | 44.4%           |
| Mahendra J (2022)           | ** *             | *                    | **              | 6/9            | 66.7%           |
| George AK (2021)            | ** *             | **                   | **              | 7/9            | 77.8%           |
| Akram Z (2020)              | *                | *                    | **              | 4/9            | 44.4%           |
| Altingoz (2020)             | **               |                      | **              | 4/9            | 44.4%           |
| Agrawal AA (2019)           | *                | *                    | **              | 4/9            | 44.4%           |
| Suresh R (2019)             | * *              | *                    | **              | 5/9            | 55.6%           |
| Zainab AJAA (2019)          | * *              | **                   | **              | 6/9            | 66.7%           |
| Acharya AB (2018)           | *                | *                    | **              | 4/9            | 44.4%           |
| Dogan SB (2016a)            | ** *             | *                    | **              | 6/9            | 66.7%           |
| Dogan SB (2016b)            | ** *             | *                    | **              | 6/9            | 66.7%           |
| Grdovic N (2016)            | ** *             | *                    | **              | 6/9            | 66.7%           |
| Mishra V (2016)             | *                | *                    | **              | 4/9            | 44.4%           |
| Vaghani H (2016)            | * *              |                      | **              | 4/9            | 44.4%           |
| Acharya AB (2015)           | *                |                      | **              | 3/9            | 33.3%           |
| Matic Petrovic S (2015)     | * *              |                      | **              | 4/9            | 44.4%           |
| Muthu J (2015)              | *                | *                    | **              | 4/9            | 44.4%           |
| Srinivasa TS (2015)         | ** *             |                      | **              | 5/9            | 55.6%           |
| Corbi SCT (2014)            | *                | *                    | **              | 4/9            | 44.4%           |
| Gokhale NH (2014)           | **               | *                    | **              | 5/9            | 55.6%           |
| Javed F (2014)              | **               | **                   | **              | 6/9            | 66.7%           |
| Perayil J (2014)            | * *              | *                    | **              | 5/9            | 55.6%           |
| Rajan P (2013)              | *                |                      | **              | 3/9            | 33.3%           |

|                       |     |   |     |     |     |       |
|-----------------------|-----|---|-----|-----|-----|-------|
| Rao Deepika PC (2013) | * * | * | *   | * * | 6/9 | 66.7% |
| Zizzi A (2013)        | * * |   | *   | * * | 5/9 | 55.6% |
| Saxena RM (2012)      | * * | * | *   | * * | 6/9 | 66.7% |
| Pan Z (2010)          | * * | * | *   |     | 4/9 | 44.4% |
| Wolff RE (2009)       | * * | * | * * | * * | 7/9 | 77.8% |
| Akalin FA (2008)      | *   | * | *   | * * | 5/9 | 55.6% |

---
