# Supplementary material for: Association between Periodontitis and HbA1c Levels in Non-Diabetic Patients: A Systematic Review and Meta-Analysis
Source: Healthcare (Basel). 2023 Sep 28;11(19):2649. doi: 10.3390/healthcare11192649 (PMC10572398; doi:10.3390/healthcare11192649)
Supplement: Supplementary file 1 [file healthcare-11-02649-s001.zip]

Archive with 9 entries (9 files):
- Figure S1.jpg
- Figure S2.jpg
- Figure S3.jpg
- Figure S4.jpg
- PRISMA_2020_checklist.pdf
- Table S1. Search Term.pdf
- Table S2. Data collection.pdf
- Table S3. Modified NOS for cross-sectional studies.pdf
- Table S4. Quality assessment.pdf
